# Supplementary material for: Evaluation Methods in Process-Aware Information Systems Research with a Perspective on Human Orientation
Source: Springer Nature journal article supplement (doi:10.1007/s12599-016-0427-3), 2016-03-01
Supplement: MOESM1 [file 7501680]

---

## Appendix A: Complete List of Selected Literature

In the following, we will display the selected publications for the literature review belongs to the found evaluation methods in the fields of human orientation (Table 1), security (Table 2), and visualization (Table 3).

**Table 1** List of selected papers for human orientation (Evaluation Methods(*EM*):*Behavior-based* (*B*), *Opinion-based* (*O*), and *Predictive* (*P*) as well as Artifacts (*A*): *Theoretical* (*T*) and *Executable* (*E*)).

| A                                   |                                     | EM                                  |                                     |                                     | Reference                                                                                                                                                                                                                                                                                                                                                                                                                                                                                                                                                                                                                                                                                                                                                                                                |
|-------------------------------------|-------------------------------------|-------------------------------------|-------------------------------------|-------------------------------------|----------------------------------------------------------------------------------------------------------------------------------------------------------------------------------------------------------------------------------------------------------------------------------------------------------------------------------------------------------------------------------------------------------------------------------------------------------------------------------------------------------------------------------------------------------------------------------------------------------------------------------------------------------------------------------------------------------------------------------------------------------------------------------------------------------|
| E                                   | T                                   | B                                   | O                                   | P                                   |                                                                                                                                                                                                                                                                                                                                                                                                                                                                                                                                                                                                                                                                                                                                                                                                          |
| <input checked="" type="checkbox"/> | Corallo et al. (2007)                                                                                                                                                                                                                                                                                                                                                                                                                                                                                                                                                                                                                                                                                                                                                                                    |
| <input checked="" type="checkbox"/> | <input checked="" type="checkbox"/> | <input type="checkbox"/>            | <input checked="" type="checkbox"/> | <input type="checkbox"/>            | Vanderfeesten and Reijers (2006)                                                                                                                                                                                                                                                                                                                                                                                                                                                                                                                                                                                                                                                                                                                                                                         |
| <input checked="" type="checkbox"/> | <input checked="" type="checkbox"/> | <input type="checkbox"/>            | <input type="checkbox"/>            | <input checked="" type="checkbox"/> | Kleiner (2004); Brander et al. (2011); Delias et al. (2011); Gupta et al. (2011); Dorn et al. (2011)                                                                                                                                                                                                                                                                                                                                                                                                                                                                                                                                                                                                                                                                                                     |
| <input checked="" type="checkbox"/> | <input type="checkbox"/>            | <input checked="" type="checkbox"/> | <input checked="" type="checkbox"/> | <input checked="" type="checkbox"/> | Russo et al. (2012)                                                                                                                                                                                                                                                                                                                                                                                                                                                                                                                                                                                                                                                                                                                                                                                      |
| <input checked="" type="checkbox"/> | <input type="checkbox"/>            | <input checked="" type="checkbox"/> | <input checked="" type="checkbox"/> | <input type="checkbox"/>            | Koschmider et al. (2010)                                                                                                                                                                                                                                                                                                                                                                                                                                                                                                                                                                                                                                                                                                                                                                                 |
| <input checked="" type="checkbox"/> | <input type="checkbox"/>            | <input checked="" type="checkbox"/> | <input type="checkbox"/>            | <input type="checkbox"/>            | Nakatumba and Aalst (2010)                                                                                                                                                                                                                                                                                                                                                                                                                                                                                                                                                                                                                                                                                                                                                                               |
| <input checked="" type="checkbox"/> | <input type="checkbox"/>            | <input checked="" type="checkbox"/> | <input type="checkbox"/>            | <input checked="" type="checkbox"/> | Nissen (2005)                                                                                                                                                                                                                                                                                                                                                                                                                                                                                                                                                                                                                                                                                                                                                                                            |
| <input checked="" type="checkbox"/> | <input type="checkbox"/>            | <input type="checkbox"/>            | <input checked="" type="checkbox"/> | <input type="checkbox"/>            | Vanderfeesten and Reijers (2005); Vanderfeesten (2005); Waal and Batenburg (2009)                                                                                                                                                                                                                                                                                                                                                                                                                                                                                                                                                                                                                                                                                                                        |
| <input checked="" type="checkbox"/> | <input type="checkbox"/>            | <input type="checkbox"/>            | <input checked="" type="checkbox"/> | <input checked="" type="checkbox"/> | Capon and Ramsay (1997)                                                                                                                                                                                                                                                                                                                                                                                                                                                                                                                                                                                                                                                                                                                                                                                  |
| <input checked="" type="checkbox"/> | <input type="checkbox"/>            | <input type="checkbox"/>            | <input type="checkbox"/>            | <input checked="" type="checkbox"/> | Huang et al. (2011); Satzger et al. (2011); Martinho and Silva (2012); Plakoutsi et al. (2013)                                                                                                                                                                                                                                                                                                                                                                                                                                                                                                                                                                                                                                                                                                           |
| <input type="checkbox"/>            | <input checked="" type="checkbox"/> | <input checked="" type="checkbox"/> | <input checked="" type="checkbox"/> | <input checked="" type="checkbox"/> | Stoitsev et al. (2008); Dengler and Vrandecic (2011); Sousa et al. (2011)                                                                                                                                                                                                                                                                                                                                                                                                                                                                                                                                                                                                                                                                                                                                |
| <input type="checkbox"/>            | <input checked="" type="checkbox"/> | <input type="checkbox"/>            | <input checked="" type="checkbox"/> | <input checked="" type="checkbox"/> | Seidel et al. (2010a); Witschel et al. (2010); Seidel (2011)                                                                                                                                                                                                                                                                                                                                                                                                                                                                                                                                                                                                                                                                                                                                             |
| <input type="checkbox"/>            | <input checked="" type="checkbox"/> | <input checked="" type="checkbox"/> | <input type="checkbox"/>            | <input type="checkbox"/>            | Kolb et al. (2012c)                                                                                                                                                                                                                                                                                                                                                                                                                                                                                                                                                                                                                                                                                                                                                                                      |
| <input type="checkbox"/>            | <input checked="" type="checkbox"/> | <input type="checkbox"/>            | <input type="checkbox"/>            | <input checked="" type="checkbox"/> | Becker-Kornstaedt et al. (1999); Frank et al. (2000); Faustmann (2000); van der Aalst and Kumar (2001); Jørgensen (2002); Zur Muehlen (2004); van der Aalst and Song (2004); Jang and Choi (2004); Hee et al. (2005); Russell et al. (2005); Bayer et al. (2006); Xiao et al. (2006); Roger et al. (2006); La Rosa et al. (2007); Seidel et al. (2007); Russell and Aalst (2008); Macris et al. (2008); Schonenberg et al. (2008); Kunzle and Reichert (2009); Dorn et al. (2010); Leonardi et al. (2010); Ouyang et al. (2010); Seidel et al. (2010b); Daniel et al. (2010); Zacarias et al. (2010); Glykas (2011); Ouyang et al. (2011); Sajjad et al. (2011); Yu et al. (2011); Kabicher and Rinderle-Ma (2011); Puente and Díaz (2012); Kabicher-Fuchs and Rinderle-Ma (2012); Grambow et al. (2012) |

---

**Table 2** List of selected papers for security (Evaluation Methods(*EM*):*Behavior-based* (*B*), *Opinion-based* (*O*), and *Predictive* (*P*) as well as Artifacts (*A*): *Theoretical* (*T*) and *Executable* (*E*)).

| A                                   |                                     | EM                                  |                                     |                                     | Reference                                                                                                                                                                                                                                                                                                                                                                                                                                                                                                                                                                                                                                                                                                                                                                                                                                                                                                                                                                                                                                                                                                                                                                                                                          |
|-------------------------------------|-------------------------------------|-------------------------------------|-------------------------------------|-------------------------------------|------------------------------------------------------------------------------------------------------------------------------------------------------------------------------------------------------------------------------------------------------------------------------------------------------------------------------------------------------------------------------------------------------------------------------------------------------------------------------------------------------------------------------------------------------------------------------------------------------------------------------------------------------------------------------------------------------------------------------------------------------------------------------------------------------------------------------------------------------------------------------------------------------------------------------------------------------------------------------------------------------------------------------------------------------------------------------------------------------------------------------------------------------------------------------------------------------------------------------------|
| E                                   | T                                   | B                                   | O                                   | P                                   |                                                                                                                                                                                                                                                                                                                                                                                                                                                                                                                                                                                                                                                                                                                                                                                                                                                                                                                                                                                                                                                                                                                                                                                                                                    |
| <input checked="" type="checkbox"/> | <input type="checkbox"/>            | <input checked="" type="checkbox"/> | <input checked="" type="checkbox"/> | <input checked="" type="checkbox"/> | D'Aubeterre et al. (2009, 2008)                                                                                                                                                                                                                                                                                                                                                                                                                                                                                                                                                                                                                                                                                                                                                                                                                                                                                                                                                                                                                                                                                                                                                                                                    |
| <input checked="" type="checkbox"/> | <input type="checkbox"/>            | <input type="checkbox"/>            | <input type="checkbox"/>            | <input checked="" type="checkbox"/> | Paci et al. (2008)                                                                                                                                                                                                                                                                                                                                                                                                                                                                                                                                                                                                                                                                                                                                                                                                                                                                                                                                                                                                                                                                                                                                                                                                                 |
| <input checked="" type="checkbox"/> | <input checked="" type="checkbox"/> | <input type="checkbox"/>            | <input type="checkbox"/>            | <input checked="" type="checkbox"/> | Casati et al. (2001); Gudes and Tubman (2002); Wu et al. (2002); Singh and Salam (2006); Thomas et al. (2007); Russello et al. (2008); Lehmann and Lohmann (2012)                                                                                                                                                                                                                                                                                                                                                                                                                                                                                                                                                                                                                                                                                                                                                                                                                                                                                                                                                                                                                                                                  |
| <input type="checkbox"/>            | <input checked="" type="checkbox"/> | <input type="checkbox"/>            | <input checked="" type="checkbox"/> | <input type="checkbox"/>            | Spears and Barki (2010)                                                                                                                                                                                                                                                                                                                                                                                                                                                                                                                                                                                                                                                                                                                                                                                                                                                                                                                                                                                                                                                                                                                                                                                                            |
| <input type="checkbox"/>            | <input checked="" type="checkbox"/> | <input type="checkbox"/>            | <input type="checkbox"/>            | <input checked="" type="checkbox"/> | Thomas and Sandhu (1993); Atluri and Huang (1996, 1997); Bertino et al. (1997); Gudes et al. (1998); Bertino et al. (1999); Gudes et al. (1999); Huang and Atluri (1999); Ahn et al. (2000); Botha and Eloff (2001a,b,c); Kang et al. (2001); Park et al. (2001); Kandala and Sandhu (2002); Lodderstedt et al. (2002); Venter and Olivier (2002); Wainer et al. (2003); Hung and Karlapalem (2003); Koshutanski and Massacci (2003); Kalam et al. (2003); Basin et al. (2003); Oh and Park (2003); Koshutanski and Massacci (2004); Shafiq et al. (2005); Weber et al. (2005); Sun et al. (2006); Bertino et al. (2006); Kim et al. (2006); Bhatti et al. (2007); Agrawal et al. (2007); Wainer et al. (2007); Wolter et al. (2008); Iyer et al. (2008); Gaaloul et al. (2008); Mendling et al. (2008); Wolter et al. (2009); Cao et al. (2009); Park et al. (2009); Wang and Bayrak (2009); Hasebe and Mabuchi (2010); Hsiao and Hwang (2010); Gaaloul et al. (2010); Accorsi et al. (2011); Arsac et al. (2011); Fuchs et al. (2011); Leitner et al. (2011b,a); Ma et al. (2011); Monakova and Schaad (2011); Brucker and Hang (2012); Cabanillas et al. (2012); Khan and Fong (2012); Leitner et al. (2012); Lim et al. (2012) |

**Table 3** List of selected papers for visualization (Evaluation Methods(*EM*):*Behavior-based* (*B*), *Opinion-based* (*O*), and *Predictive* (*P*) as well as Artifacts (*A*): *Theoretical* (*T*) and *Executable* (*E*)).

| A |   | EM |   |   | Reference                                                                                                                                                                                                                                                                                                                                                                                                                                                                                                                                                                                                                                                                                                                                                                                                                                                                                                                                                                                                                                                                                                                                                                                                                                                                                                                                                                                                                                                                                  |
|---|---|----|---|---|--------------------------------------------------------------------------------------------------------------------------------------------------------------------------------------------------------------------------------------------------------------------------------------------------------------------------------------------------------------------------------------------------------------------------------------------------------------------------------------------------------------------------------------------------------------------------------------------------------------------------------------------------------------------------------------------------------------------------------------------------------------------------------------------------------------------------------------------------------------------------------------------------------------------------------------------------------------------------------------------------------------------------------------------------------------------------------------------------------------------------------------------------------------------------------------------------------------------------------------------------------------------------------------------------------------------------------------------------------------------------------------------------------------------------------------------------------------------------------------------|
| E | T | B  | O | P |                                                                                                                                                                                                                                                                                                                                                                                                                                                                                                                                                                                                                                                                                                                                                                                                                                                                                                                                                                                                                                                                                                                                                                                                                                                                                                                                                                                                                                                                                            |
| ☒ | ☐ | ☐  | ☐ | ☒ | Cleetus et al. (1996); Mann (1999); Schönhage et al. (2000); Six and Tollis (2002); Ferraiolo et al. (2003); Yang et al. (2004); Hodel et al. (2004); Prechelt and Hutzler (2005); van der Aalst (2005); Hao et al. (2006); Dury et al. (2007); Suntinger et al. (2008); Melcher and Seese (2008); Gregoriades and Sutcliffe (2008); Bergenthum et al. (2008); Zhao et al. (2009); Albrecht et al. (2010); Brown et al. (2011); Guo et al. (2011); Claes et al. (2012); Misue and Yazaki (2012); Kabicher-Fuchs et al. (2012)                                                                                                                                                                                                                                                                                                                                                                                                                                                                                                                                                                                                                                                                                                                                                                                                                                                                                                                                                              |
| ☒ | ☐ | ☐  | ☒ | ☒ | Li et al. (2007); West et al. (2010); Frisch and Dachselt (2010); Müller et al. (2012); Seyfang et al. (2012)                                                                                                                                                                                                                                                                                                                                                                                                                                                                                                                                                                                                                                                                                                                                                                                                                                                                                                                                                                                                                                                                                                                                                                                                                                                                                                                                                                              |
| ☒ | ☐ | ☒  | ☐ | ☒ | Poppe et al. (2012)                                                                                                                                                                                                                                                                                                                                                                                                                                                                                                                                                                                                                                                                                                                                                                                                                                                                                                                                                                                                                                                                                                                                                                                                                                                                                                                                                                                                                                                                        |
| ☒ | ☐ | ☒  | ☒ | ☐ | Feng et al. (2010)                                                                                                                                                                                                                                                                                                                                                                                                                                                                                                                                                                                                                                                                                                                                                                                                                                                                                                                                                                                                                                                                                                                                                                                                                                                                                                                                                                                                                                                                         |
| ☒ | ☐ | ☒  | ☒ | ☒ | Kriglstein et al. (2012)                                                                                                                                                                                                                                                                                                                                                                                                                                                                                                                                                                                                                                                                                                                                                                                                                                                                                                                                                                                                                                                                                                                                                                                                                                                                                                                                                                                                                                                                   |
| ☐ | ☒ | ☐  | ☐ | ☒ | Ferraiolo et al. (1999); Koch et al. (2002); Virine and Rapley (2003); Momotko and Nowicki (2003); Günther and van der Aalst (2006); Kindler and Ples (2004); Brown and Paik (2005); Dustdar et al. (2005); Streit et al. (2005); Barborcka et al. (2006); Bobrik et al. (2006); Bobrik and Bauer (2007); Hammori et al. (2006); Stilhammer et al. (2006); Rozinat and van der Aalst (2006); Rozinat and der Aalst (2006); Jørgensen et al. (2007); Maier and Minas (2007); Betz et al. (2008); Polyvyanyy et al. (2008); Kovács and Gónczy (2008); Varró et al. (2008); Xu et al. (2008); Cruz et al. (2008); Song and van der Aalst (2008); Brown and Paik (2009); Wong et al. (2009); Brown and Recker (2009); Eichhorn et al. (2009); Tominski (2011); Kitzmann et al. (2009); Draheim et al. (2009); Fritzsche et al. (2009); Bergenthum et al. (2009); Reichert et al. (2010); Maier and Minas (2010); Mosser et al. (2010); Esgin et al. (2010); Cruz et al. (2010); Hernández et al. (2010); Poelmans et al. (2010); Zhang et al. (2010); Günther et al. (2009); Müller and Rogge-Solti (2011); Kedji et al. (2011); Harbach and Smith (2011); Kim et al. (2011); Molloy et al. (2011); Jans et al. (2011); Lodhi et al. (2013); Forestier et al. (2012); Kolb et al. (2012a,b); Karagiannis et al. (2012); Deng et al. (2012); Ly et al. (2012); Kriglstein and Rinderle-Ma (2012); Lawson and Zhu (2012); Monakova et al. (2012); Brucker et al. (2012); Mahdiraji et al. (2012) |
| ☐ | ☒ | ☐  | ☒ | ☒ | Kabicher et al. (2011)                                                                                                                                                                                                                                                                                                                                                                                                                                                                                                                                                                                                                                                                                                                                                                                                                                                                                                                                                                                                                                                                                                                                                                                                                                                                                                                                                                                                                                                                     |
| ☒ | ☒ | ☐  | ☐ | ☒ | Glicksman et al. (1995); Muic and Matko (1999); Jain et al. (2001); Rozinat et al. (2008); Kochut et al. (2003); Ermel et al. (2003); Karger and Quan (2004); Dongen and Aalst (2004a,b); van der Aalst et al. (2005); Kleiner (2005); Yamamoto et al. (2005); Shan et al. (2006); Hlupic et al. (2006); Jablonski and Goetz (2007); Jensen et al. (2007); Zhang and Serban (2007); Philippí and Hill (2007); Leoni et al. (2008); Ren et al. (2008); Maier and Minas (2008); Verbeek et al. (2008); van der Aalst et al. (2008); Rozinat and van der Aalst (2008); Mankanju et al. (2008); Carmona et al. (2008); Cardi et al. (2009); Schumm et al. (2009); Piessens et al. (2010); Mans et al. (2010); Brown (2010); Jiang et al. (2010); Hegedüs et al. (2010); Hines et al. (2010); Kühne et al. (2010); Bose and van der Aalst (2010); Rodríguez et al. (2010); Veiga and Ferreira (2009); van der Aalst et al. (2011); Li et al. (2011); Ploom et al. (2012); Guo et al. (2012); Dobrilovic et al. (2012); Colantonio et al. (2012); Sohr et al. (2012); Liu et al. (2012); Gouglidis and Mavridis (2012); Adriansyah and Buijs (2012); de Leoni et al. (2012b); Jagadeesh Chandra Bose and van der Aalst (2012); Ferreira and Alves (2012)                                                                                                                                                                                                                                         |
| ☒ | ☒ | ☐  | ☒ | ☒ | Gottschalk et al. (2009); Motahari-Nezhad et al. (2011); Nasirifard et al. (2011); Zugal et al. (2012); Cheek and Shehab (2012); Pantazos et al. (2012)                                                                                                                                                                                                                                                                                                                                                                                                                                                                                                                                                                                                                                                                                                                                                                                                                                                                                                                                                                                                                                                                                                                                                                                                                                                                                                                                    |
| ☒ | ☒ | ☒  | ☒ | ☒ | Giordano et al. (2010); de Leoni et al. (2012a)                                                                                                                                                                                                                                                                                                                                                                                                                                                                                                                                                                                                                                                                                                                                                                                                                                                                                                                                                                                                                                                                                                                                                                                                                                                                                                                                                                                                                                            |

---

## References

- Accorsi R, Wonnemann C, Dochow S (2011) SWAT: a security workflow analysis toolkit for reliably secure process-aware information systems. In: Proceedings of the 6th International Conference on Availability, Reliability and Security (ARES) Workshops, IEEE Computer Society, pp 692–697
- Adriansyah A, Buijs J (2012) Mining process performance from event logs. In: Proceedings of the Business Process Management Workshops, Springer, Heidelberg, pp 217–218
- Agrawal A, Amend M, Das M, Ford M, Keller C, Kloppmann M, Koenig D, Leymann F, Mueller R, Pfau G, et al. (2007) WS-BPEL extension for people (BPEL4People). Specification 1.0, Active Endpoints Inc., Adobe Systems Inc., BEA Systems Inc., International Business Machines Corporation, Oracle Inc., and SAP AG
- Ahn GJ, Sandhu R, Kang M, Park J (2000) Injecting RBAC to secure a web-based workflow system. In: Proceedings of the 5th ACM Workshop on Role-Based Access Control, ACM, pp 1–10
- Albrecht B, Effinger P, Held M, Kaufmann M (2010) An automatic layout algorithm for bpele processes. In: Proceedings of the 5th International Symposium on Software Visualization, ACM, SOFTVIS'10, pp 173–182
- Arsac W, Compagna L, Kaluvuri SP, Ponta SE (2011) Security validation tool for business processes. In: Proceedings of the 16th ACM Symposium on Access Control Models and Technologies, ACM, SACMAT'11, pp 143–144
- Atluri V, Huang WK (1996) An authorization model for workflows. In: Proceedings of the 4th European Symposium on Research in Computer Security (ESORICS), Springer, Heidelberg, pp 44–64
- Atluri V, Huang WK (1997) Enforcing mandatory and discretionary security in workflow management systems. *J Comput Secur* 5(4):303–339
- Barborka P, Helm L, Köldorfer G, Mendling J, Neumann G, van Dongen BF, Verbeek E, van der Aalst WMP (2006) Integration of epc-related tools with prom. In: Nüttgens M, Rump FJ, Mendling J (eds) Proceedings of the 5th Workshop der Gesellschaft für Informatik e.V. (GI) und Treffen ihres Arbeitskreises Geschäftsprozessmanagement mit Ereignisgesteuerten Prozessketten (WI-EPK), CEUR-WS.org, CEUR Workshop Proceedings, pp 105–120

- 
- Basin D, Doser J, Lodderstedt T (2003) Model driven security for process-oriented systems. In: Proceedings of the 8th ACM Symposium on Access Control Models and Technologies (SACMAT), ACM, pp 100–109
- Bayer K, Kempf S, Brocks H, Kamps T (2006) A multiagent environment for the flexible enactment of knowledge-intensive processes. *Cybern Syst* 37(6):653–672
- Becker-Kornstaedt U, Hamann D, Kempkens R, Rösch P, Verlage M, Webby R, Zettel J (1999) Support for the process engineer: The spearmint approach to software process definition and process guidance. In: Proceedings of the International Conference on Advanced Information Systems Engineering (CAISE), Springer, Heidelberg
- Bergenthum R, Desel J, Lorenz R, Mauser S (2008) Synthesis of petri nets from scenarios with viptool. In: Proceedings of the 29th International Conference on Applications and Theory of Petri Nets (PETRI NETS'08), Springer, Heidelberg, pp 388–398
- Bergenthum R, Desel J, Mauser S, Lorenz R (2009) Construction of process models from example runs. In: Transactions on petri nets and other models of concurrency II, Springer, Heidelberg, pp 243–259
- Bertino E, Ferrari E, Atluri V (1997) A flexible model supporting the specification and enforcement of role-based authorization in workflow management systems. In: Proceedings of the 2nd ACM workshop on Role-based access control, ACM, pp 1–12
- Bertino E, Ferrari E, Atluri V (1999) The specification and enforcement of authorization constraints in workflow management systems. *ACM Trans Inf Syst Secur* 2(1):65–104
- Bertino E, Crampton J, Paci F (2006) Access control and authorization constraints for WS-BPEL. In: Proceedings of the 13th IEEE International Conference on Web Services (ICWS), IEEE Computer Society, pp 275–284
- Betz S, Eichhorn D, Hickl S, Klink S, Koschmider A, Li Y, Oberweis A, Trunko R (2008) 3D representation of business process models. In: Modellierung betrieblicher Informationssysteme – Modellierung zwischen SOA und Compliance Management, GI, MoBIS
- Bhatti R, Sanz D, Bertino E, Ghafoor A (2007) A policy-based authorization framework for web services: Integrating XGTRBAC and WS-policy. In: Proceedings of the IEEE International Conference on Web Services (ICWS), IEEE Computer Society, pp 447–454

- 
- Bobrik R, Bauer T (2007) Towards configurable process visualizations with proviado. In: Proceedings of the 16th IEEE International Workshops on Enabling Technologies: Infrastructure for Collaborative Enterprises, IEEE Computer Society, WETICE'07, pp 367–369
- Bobrik R, Bauer T, Reichert M (2006) Proviado – personalized and configurable visualizations of business processes. In: Proceedings of the 7th International Conference on E-Commerce and Web Technologies, Springer, Heidelberg, EC-Web'06, pp 61–71
- Bose RPJC, van der Aalst WMP (2010) Trace alignment in process mining: opportunities for process diagnostics. In: Proceedings of the 8th International Conference on Business Process Management (BPM), Springer, Heidelberg, pp 227–242
- Botha R, Eloff J (2001a) Access control in document-centric workflow systems – an agent-based approach. *Comput Secur* 20:525–532
- Botha RA, Eloff JH (2001b) A framework for access control in workflow systems. *Inf Manag Comput Secur* 9(3):126 – 133
- Botha RA, Eloff JHP (2001c) Separation of duties for access control enforcement in workflow environments. *IBM Syst J* 40(3):666–682
- Brander S, Hinkelmann K, Hu B, Martin A, Riss U, Thönnissen B, Witschel H (2011) Refining process models through the analysis of informal work practice. In: Rinderle-Ma S, Toumani F, Wolf K (eds) Proceedings of the International Conference on Business Process Management (BPM), LNCS, Springer, Heidelberg, pp 116–131
- Brown R (2010) Conceptual modelling in 3D virtual worlds for process communication. In: Proceedings of the Asia-Pacific Conferences on Conceptual Modelling, APCCM 2010
- Brown R, Paik Hy (2005) Resource-centric worklist visualisation. In: Proceedings of the 2005 Confederated International Conference on On the Move to Meaningful Internet Systems – Volume Part I, Springer, Heidelberg, OTM'05, pp 94–111
- Brown R, Paik HY (2009) Multi-faceted visualisation of worklists. *J Data Semant* 12:153–178
- Brown RA, Recker JC (2009) Improving the traversal of large hierarchical process repositories. In: Proceedings of the 20th Australasian Conference on Information Systems, ACIS 2009
- Brown RA, Recker JC, West S (2011) Using virtual worlds for collaborative business process modeling. *J Bus Process Manag* 17(3)

- 
- Brucker A, Hang I (2012) Secure and compliant implementation of business process-driven systems. In: Proceedings of the Business Process Management Workshops, Springer, Heidelberg, LNBIP, pp 662–674
- Brucker AD, Hang I, Lückemeyer G, Ruparel R (2012) SecureBPMN: modeling and enforcing access control requirements in business processes. In: Proceedings of the 17th ACM Symposium on Access Control Models and Technologies (SACMAT'12), ACM, pp 123–126
- Cabanillas C, Resinas M, Ruiz-Cortes A (2012) Automated resource assignment in BPMN models using RACI matrices. In: Proceedings of the 20th International Conference on Cooperative Information Systems (CoopIS), LNCS, Springer, Heidelberg, pp 56–73
- Cao J, Chen J, Zhao H, Li M (2009) A policy-based authorization model for workflow-enabled dynamic process management. *J Netw Comput Appl* 32(2):412–422
- Capon N, Ramsay A (1997) Workflow systems: how best to manage people in a workflow environment. *Manag Serv*
- Cardi F, de Leoni M, Adams M, ter Hofstede AHM, van der Aalst WMP (2009) Visual support for work assignment in YAWL. In: Proceedings of the Business Process Management Demonstration Track, BPMDemos 2009
- Carmona J, Cortadella J, Kishinevsky M (2008) A region-based algorithm for discovering petri nets from event logs. In: Proceedings of the 6th International Conference on Business Process Management (BPM), Springer, Heidelberg
- Casati F, Castano S, Fugini MG (2001) Managing workflow authorization constraints through active database technology. *Inf Syst Front* 3(3):319–338
- Cheek GP, Shehab M (2012) Policy-by-example for online social networks. In: Proceedings of the 17th ACM Symposium on Access Control Models and Technologies, ACM, SACMAT'12, pp 23–32
- Claes J, Vanderfeesten I, Pinggera J, Reijers H, Weber B, Poels G (2012) Visualizing the process of process modeling with ppmcharts. In: Proceedings of the business process management workshops, Springer, Heidelberg, pp 744–755
- Cleetus KJ, Cascaval GC, Matsuzaki K (1996) Pact-a software package to manage projects and coordinate people. In: Proceedings of the 5th International Workshops on Enabling Technologies: Infrastructure for Collaborative Enterprises, IEEE Computer Society, WET-ICE'96

- 
- Colantonio A, Pietro RD, Ocello A, Verde NV (2012) Visual role mining: a picture is worth a thousand roles. *IEEE Trans Knowl Data Eng* 24(6):1120–1133
- Corallo A, Lazoi M, Margherita A, Scalvenzi M (2007) Optimizing competence management processes: a case study in the aerospace industry. *Bus Process Manag J* 16(2):297–314
- Cruz IF, Gjomemo R, Lin B, Orsini M (2008) A location aware role and attribute based access control system. In: *Proceedings of the 16th ACM SIGSPATIAL International Conference on Advances in Geographic Information Systems*, ACM, GIS'08
- Cruz IF, Gjomemo R, Jarzab G (2010) An interoperation framework for secure collaboration among organizations. In: *Proceedings of the 3rd ACM SIGSPATIAL International Workshop on Security and Privacy in GIS and LBS*, ACM, SPRINGL'10, pp 4–11
- Daniel F, Soi S, Tranquillini S, Casati F, Heng C, Yan L (2010) From people to services to ui: Distributed orchestration of user interfaces. In: *Proceedings of the international conference on business process management (bpm)*, Springer, Heidelberg
- D'Aubeterre F, Singh R, Iyer L (2008) Secure activity resource coordination: empirical evidence of enhanced security awareness in designing secure business processes. *Europ J Inf Syst* 17(5):528–542
- D'Aubeterre F, Iyer LS, Singh R (2009) An empirical evaluation of information security awareness levels in designing secure business processes. In: *Proceedings of the 4th International Conference on Design Science Research in Information Systems and Technology (DESRIST)*, ACM, pp 16:1–16:11
- Delias P, Doulamis A, Doulamis N, Matsatsinis N (2011) Optimizing resource conflicts in workflow management systems. *IEEE Trans Knowl Data Eng* 23(3):417–432
- Deng J, Chen B, Zeng J (2012) Model transformation method for compensation events and tasks from business process model to flowchart. In: *Proceedings of the 3rd International Conference on Information Computing and Applications*, Springer, Heidelberg, ICICA'12, pp 468–476
- Dengler F, Vrandecic D (2011) Wiki-based maturing of process descriptions. In: *Proceedings of the International Conference on Business Process Management (BPM)*, Springer, Heidelberg
- Dobrilovic D, Jevtic V, Beker I, Stojanov Z (2012) Shortest-path based model for warehouse inner transportation optimization. In: *Proceedings of the 7th*



- 
- International Symposium on Applied Computational Intelligence and Informatics, IEEE Computer Society, SACI, pp 63–68
- Dongen BFv, Aalst WMPvd (2004a) EMiT: a process mining tool. In: Proceedings of the 25th International Conference Applications and Theory of Petri Nets, Springer, Heidelberg, pp 454–463
- Dongen BFv, Aalst WMPvd (2004b) Multi-phase process mining: Building instance graphs. In: Proceedings of the 23rd International Conference on Conceptual Modeling (ER), Springer, Heidelberg, pp 362–376
- Dorn C, Burkhart T, Werth D, Dustdar S (2010) Self-adjusting recommendations for people-driven ad-hoc processes. In: Proceedings of the International Conference on Business Process Management (BPM), Springer, Heidelberg
- Dorn C, Marín CA, Mehandjiev N, Dustdar S (2011) Self-learning predictor aggregation for the evolution of people-driven ad-hoc processes. In: Proceedings of the international conference on business process management (bpm), Springer, Heidelberg
- Draheim D, Himsl M, Jabornig D, Leithner W, Regner P, Wiesinger T (2009) Intuitive visualization-oriented metamodeling. In: Proceedings of the 20th International Conference on Database and Expert Systems Applications, Springer, Heidelberg, DEXA'09
- Dury A, Boroday S, Petrenko A, Lotz V (2007) Formal verification of business workflows and role based access control systems. In: Proceedings of the 1st International Conference on Emerging Security Information, Systems and Technologies, IEEE Computer Society, SECURWARE 2007, pp 201–210
- Dustdar S, Hoffmann T, van der Aalst WMP (2005) Mining of ad-hoc business processes with TeamLog. *Data Knowl Eng* 55:129–158
- Eichhorn D, Koschmider A, Li Y, Sturzel P, Oberweis A, Trunko R (2009) 3D support for business process simulation. In: Proceedings of the 2009 33rd Annual IEEE International Computer Software and Applications Conference, IEEE Computer Society, COMPSAC'09, pp 73–80
- Ermel C, Bardohl R, Ehrig H (2003) Generation of animation views for petri nets in GenGED. In: *Petri net technology for communication-based systems*, Springer, Heidelberg
- Esgin E, Senkul P, Cimenbicer C (2010) A hybrid approach for process mining: using from-to chart arranged by genetic algorithms. In: Proceedings of the 5th International Conference on Hybrid Artificial Intelligence Systems, Springer, Heidelberg, HAIS'10, pp 178–186

- 
- Faustmann G (2000) Configuration for adaptation: a human-centered approach to flexible workflow enactment. *Comput Support Coop Work (CSCW)* 9(3-4):413–434
- Feng X, Ge B, Sun Y, Wang Z, Tang D (2010) Enhancing role management in role-based access control. In: *IEEE International Conference on Broadband Network and Multimedia Technology, IC-BNMT 2010*, pp 677–683
- Ferraiolo DF, Barkley JF, Kuhn DR (1999) A role-based access control model and reference implementation within a corporate intranet. *ACM Trans Inf Syst Secur* 2(1):34–64
- Ferraiolo DF, Chandramouli R, Ahn GJ, Gavrila SI (2003) The role control center: features and case studies. In: *Proceedings of the 8th ACM Symposium on Access Control Models and Technologies, ACM, SACMAT'03*
- Ferreira D, Alves C (2012) Discovering user communities in large event logs. In: *Proceedings of the business process management workshops*, Springer, Heidelberg, pp 123–134
- Forestier G, Lalys F, Riffaud L, Trelhu B, Jannin P (2012) Classification of surgical processes using dynamic time warping. *J Biomed Inform* 45(2):255–264
- Frank A, Sellentin J, Mitschang B (2000) TOGA – a customizable service for data-centric collaboration. *Inf Syst*
- Frisch M, Dachsel R (2010) Off-screen visualization techniques for class diagrams. In: *Proceedings of the 5th International Symposium on Software Visualization, ACM, SOFTVIS'10*, pp 163–172
- Fritzsche M, Picht M, Gilani W, Spence ITA, Brown TJ, Kilpatrick P (2009) Extending bpm environments of your choice with performance related decision support. In: *Proceedings of the 7th International Conference Business Process Management (BPM)*, Springer, Heidelberg, pp 97–112
- Fuchs L, Pernul G, Sandhu R (2011) Roles in information security a survey and classification of the research area. *Comput Secur* 30(8):748–769
- Gaaloul K, Schaad A, Flegel U, haroy F (2008) A secure task delegation model for workflows. In: *Proceedings of the International Conference on Emerging Security Information, Systems, and Technologies (SECURWARE)*, IEEE Computer Society, pp 10–15
- Gaaloul K, Zahoor E, Charoy F, Godart C (2010) Dynamic authorisation policies for event-based task delegation. In: *Proceedings of the 22nd International Conference on Advanced Information Systems Engineering (CAISE)*, Springer, Heidelberg, pp 135–149

- 
- Giordano M, Polese G, Scanniello G, Tortora G (2010) A system for visual role-based policy modelling. *J Vis Lang Comput* 21(1):41–64
- Glicksman R, Prior F, Wilson D, Keller S (1995) Image management in a multi-hospital environment. In: *Proceedings of the 4th International Conference on Image Management and Communications*, pp 173–181
- Glykas MM (2011) Effort based performance measurement in business process management. *Knowl Process Manag* 18(1):10–33
- Gottschalk F, Wagemakers TA, Jansen-Vullers MH, Aalst WMP, Rosa M (2009) Configurable process models: Experiences from a municipality case study. In: *Proceedings of the 21st International Conference on Advanced Information Systems Engineering*, Springer, Heidelberg, CAiSE'09, pp 486–500
- Gouglidis A, Mavridis I (2012) domRBAC: an access control model for modern collaborative systems. *Comput Secur* 31(4):540–556
- Grambow G, Oberhauser R, Reichert M (2012) User-centric abstraction of workflow logic applied to software engineering processes. In: *Caise Workshops*, Springer, Heidelberg
- Gregoriades A, Sutcliffe A (2008) A socio-technical approach to business process simulation. *Decis Support Syst* 45(4):1017–1030
- Gudes E, Tubman A (2002) AutoWF: a secure web workflow system using autonomous objects. *Data Knowl Eng* 43:1–27
- Gudes E, Riet RPvd, Burg JFM, Olivier MS (1998) Alter-egos and roles: supporting workflow security in cyberspaces. In: *Proceedings of the IFIP TC11 WG11.3 11th International Conference on Database Security XI: Status and Prospects*, Chapman & Hall, Ltd., pp 182–195
- Gudes E, Olivier MS, van de Riet RP (1999) Modelling, specifying and implementing workflow security in cyberspace. *J Comput Secur* 7(4):287–315
- Günther C, van der Aalst WMP (2006) Mining activity clusters from low-level event logs. Tech. rep., BETA Working Paper Series, WP 165, Eindhoven University of Technology
- Günther CW, Rozinat A, van der Aalst WMP (2009) Activity mining by global trace segmentation. In: *Business Process Management Workshops*, Springer, Heidelberg, pp 128–139
- Guo H, Brown R, Rasmussen R (2011) Human resource behaviour simulation in business processes. In: *20th International Conference on Information Systems Development*, ISD2011

- 
- Guo H, Brown R, Rasmussen R (2012) Virtual worlds as a model-view approach to the communication of business processes models. In: Proceedings of the CAiSE'12 Forum at the 24th International Conference on Advanced Information Systems Engineering, CEUR-WS.org, CAiSE Forum, pp 66–73
- Gupta M, Mukherjee D, Mani S, Singhal Sinha V, Sinha S (2011) Serving information needs in business process consulting. In: Proceedings of the International Conference on Business Process Management (BPM), Springer, Heidelberg
- Hammori M, Herbst J, Kleiner N (2006) Interactive workflow mining: requirements, concepts and implementation. *Data Knowl Eng, Special issue: Business process management* 56(1):41–63
- Hao MC, Keim DA, Dayal U, Schneidewind J (2006) Business process impact visualization and anomaly detection. *Inf Vis* 5(1):15–27
- Harbach M, Smith M (2011) Visual access control for research ecosystems. In: Proceedings of the 5th IEEE International Conference on Digital Ecosystems and Technologies, DEST 2011, pp 114–119
- Hasebe K, Mabuchi M (2010) Capability-role-based delegation in workflow systems. In: Proceedings of the 8th IEEE/IFIP International Conference on Embedded and Ubiquitous Computing (EUC), IEEE Computer Society, pp 711–717
- Hee K, Serebrenik A, Sidorova N, Voorhoeve M, Wal J (2005) The price of coordination in resource management. In: Proceedings of the International Conference on Business Process Management (BPM), Springer, Heidelberg
- Hegedüs b, Ujhelyi Z, Ráth I, Horváth A (2010) Visualization of traceability models with domain-specific layouting. *ECEASST* 32
- Hernández U, Álvarez Rodriguez F, Martín M (2010) Use processes - modeling requirements based on elements of BPMN and UML use case diagrams. In: Proceedings of the 2nd International Conference on Software Technology and Engineering, ICSTE 2010
- Hines JH, Malone TW, Gonçalves P, Herman G, Quimby J, Murphy-Hoye M, Rice J, Patten J, Ishii H (2010) Construction by replacement: a new approach to simulation modeling. *Syst Dyn Rev*
- Hlupic V, de Vreede G, Orsoni A (2006) Modelling and simulation techniques for business process analysis and re-engineering. *Int J Simul* 7(4)
- Hodel TB, Gall H, Dittrich KR (2004) Dynamic collaborative business processes within documents. In: Proceedings of the 22nd Annual International Conference on Design of Communication: The Engineering of Quality Doc-

- 
- umentation, ACM, SIGDOC'04, pp 97–103
- Hsiao YC, Hwang GH (2010) Implementing the chinese wall security model in workflow management systems. In: Proceedings of the International Symposium on Parallel and Distributed Processing with Applications (ISPA), IEEE, pp 574–581
- Huang WK, Atluri V (1999) SecureFlow: a secure web-enabled workflow management system. In: Proceedings of the 4th ACM Workshop on Role-Based Access Control, ACM, pp 83–94
- Huang Z, van der Aalst WMP, Lu X, Duan H (2011) Reinforcement learning based resource allocation in business process management. *Data Knowl Eng* 70:127–145
- Hung PCK, Karlapalem K (2003) A secure workflow model. In: Proceedings of the Australasian Information Security Workshop Conference on ACSW Frontiers, Australian Computer Society, Inc., pp 33–41
- Iyer LS, D'Aubeterre F, Singh R (2008) A semantic approach to secure collaborative inter-organizational eBusiness processes (SSCIOBP). *J Assoc Inf Syst* 9(3)
- Jablonski S, Goetz M (2007) Perspective oriented business process visualization. In: Proceedings of the International Conference on Business Process Management (BPM), Springer, Heidelberg, pp 144–155
- Jagadeesh Chandra Bose RP, van der Aalst WMP (2012) Process diagnostics using trace alignment: opportunities, issues, and challenges. *Inf Syst* 37(2):117–141
- Jain S, Workman RW, Collins LM, Ervin EC, Lathrop AP (2001) Supply chain applications II: development of a high-level supply chain simulation model. In: Proceedings of the 33rd Conference on Winter Simulation, IEEE Computer Society, WSC'01
- Jang J, Choi Y (2004) Web service based universal management of workflow resources. In: Proceedings of the 4th International Conference on Electronic Business (ICEB), pp 452–459
- Jans M, Alles M, Vasarhelyi M (2011) Process mining of event logs in internal auditing: A case study. In: Proceedings of the 2nd International Symposium on Accounting Information Systems, ISAIS
- Jensen K, Kristensen LM, Wells L (2007) Coloured petri nets and cpn tools for modelling and validation of concurrent systems. *Int J Softw Tools Technol Transf* 9(3):213–254

- 
- Jiang P, Shao X, Gao L, Qiu H, Li P (2010) A process-view approach for cross-organizational workflows management. *Adv Eng Inform* 24(2):229–240
- Jørgensen HD (2002) Interactive process models for knowledge intensive project work. In: *Project Work, CAiSE Doctoral Consortium*
- Jørgensen JB, Lassen KB, van der Aalst WMP (2007) From task descriptions via colored petri nets towards an implementation of a new electronic patient record workflow system. *Int J Softw Tools Technol Transf* 10(1):15–28
- Kabicher S, Rinderle-Ma S (2011) Human-centered process engineering based on content analysis and process view aggregation. In: *Proceedings of the International Conference on Advanced Information Systems Engineering (CAiSE)*, Springer, Heidelberg
- Kabicher S, Kriglstein S, Rinderle-Ma S (2011) Visual change tracking for business process models. In: *Proceedings of the 30th International Conference on Conceptual Modeling, Springer, Heidelberg, ER'11*, pp 504–513
- Kabicher-Fuchs S, Rinderle-Ma S (2012) Work experience in pairs - concepts, measurements and potentials. In: *Proceedings of the International Conference on Advanced Information Systems Engineering (CAiSE)*, Springer, Heidelberg
- Kabicher-Fuchs S, Kriglstein S, Figl K (2012) Timeline visualization for documenting process model change. In: *Proceedings of the 5th International Workshop on Enterprise Modelling and Information Systems Architectures, EMISA 2012*
- Kalam AAE, Benferhat S, Miège A, Baida RE, Cuppens F, Saurel C, Balbiani P, Deswarte Y, Trouessin G (2003) Organization based access control. In: *Proceedings of the 4th IEEE International Workshop on Policies for Distributed Systems and Networks (POLICY)*, IEEE Computer Society, pp 120–131
- Kandala S, Sandhu R (2002) Secure role-based workflow models. In: *Proceedings of the 15th IFIP TC11/WG11.3 Annual Working Conference on Database and Application Security*, pp 45–58
- Kang MH, Park JS, Froscher JN (2001) Access control mechanisms for inter-organizational workflow. In: *Proceedings of the 6th ACM Symposium on Access Control Models and Technologies (SACMAT)*, ACM, pp 66–74
- Karagiannis D, Moser C, Mostashari A (2012) Compliance evaluation featuring heat maps (CE-HM): a meta-modeling-based approach. In: *Proceedings of the 24th International Conference on Advanced Information Systems Engineering, Springer, Heidelberg, CAiSE'12*, pp 414–428

- 
- Karger DR, Quan D (2004) Haystack: a user interface for creating, browsing, and organizing arbitrary semistructured information. In: *Extended Abstracts on Human Factors in Computing Systems*, ACM, CHI EA'04, pp 777–778
- Kedji KA, That MTT, Coulette B, Lbath R, Tran HN, Nassar M (2011) Towards a tool-supported approach for collaborative process modeling and enactment. In: *Proceedings of the 18th Asia-Pacific Software Engineering Conference*, IEEE Computer Society, APSEC'11, pp 414–421
- Khan A, Fong P (2012) Satisfiability and feasibility in a relationship-based workflow authorization model. In: *Proceedings of the 17th European Symposium on Research in Computer Security (ESORICS)*, Springer, Heidelberg, LNCS, pp 109–126
- Kim HK, Lee RY, Yang HS (2006) Frameworks for secured business process management systems. In: *Proceedings of the 4th International Conference on Software Engineering Research, Management and Applications*, IEEE, SERA'06, pp 57–65
- Kim S, Kim DK, Lu L, Kim S, Park S (2011) A feature-based approach for modeling role-based access control systems. *J Syst Softw* 84(12):2035–2052
- Kindler E, Ples C (2004) 3D-Visualization of petri net models: Concept and realization. In: *Proceedings of the 25th International Conference Applications and Theory of Petri Nets*, Springer, Heidelberg, pp 464–473
- Kitzmann I, König C, Lubke D, Singer L (2009) A simple algorithm for automatic layout of BPMN processes. In: *Proceedings of the IEEE Conference on Commerce and Enterprise Computing*, CEC'09, pp 391–398
- Kleiner N (2004) Supporting usage-centered workflow design: Why and how? In: *Proceedings of the International Conference on Business Process Management (BPM)*, Springer, Heidelberg
- Kleiner N (2005) Delta analysis with workflow logs: aligning business process prescriptions and their reality. *Requir Eng* 10(3):212–222
- Koch M, Mancini LV, Parisi-Presicce F (2002) A graph-based formalism for RBAC. *ACM Trans Inf Syst Secur* 5(3)
- Kochut K, Arnold J, Sheth A, Miller J, Kraemer E, Arpinar B, Cardoso J (2003) IntelliGEN: a distributed workflow system for discovering protein-protein interactions. *Distrib Parallel Databases* 13(1)
- Kolb J, Kammerer K, Reichert M (2012a) Updatable process views for adapting large process models: The proView demonstrator. In: *Demo Track of the 10th International Conference on Business Process Management (BPM)*, pp

- Kolb J, Reichert M, Weber B (2012b) Using concurrent task trees for stakeholder-centered modeling and visualization of business processes. In: Proceedings of the International Conference on Subject-oriented Business Process Management, Springer, Heidelberg, S-BPM ONE 2012, pp 237–251
- Kolb J, Rudner B, Reichert M (2012c) Towards gesture-based process modeling on multi-touch devices. In: Caise Workshops, Springer, Heidelberg
- Koschmider A, Song M, Reijers HA (2010) Social software for business process modeling. *J Inf Technol*
- Koshutanski H, Massacci F (2003) An access control framework for business processes for web services. In: Proceedings of the 2003 ACM Workshop on XML Security, ACM, XMLSEC'03, pp 15–24
- Koshutanski H, Massacci F (2004) Interactive access control for web services. In: Deswarte Y, Cuppens F, Jajodia S, Wang L (eds) Security and protection in information processing systems, IFIP International Federation for Information Processing, Springer, Heidelberg, pp 150–166
- Kovács M, Gönczy L (2008) Simulation and formal analysis of workflow models. *Electron Notes Theor Comput Sci* 211:221–230
- Kriglstein S, Rinderle-Ma S (2012) A visualization concept for high-level comparison of process model versions. In: Proceedings of the Business Process Management Workshops, Springer, Heidelberg, pp 465–476
- Kriglstein S, Mangler J, Rinderle-Ma S (2012) Who is who: On visualizing organizational models in collaborative systems. In: Proceedings of the 8th IEEE International Conference on Collaborative Computing: Networking, Applications and Worksharing, IEEE Computer Society, CollaborateCom 2012
- Kühne S, Kern H, Gruhn V, Laue R (2010) Business process modeling with continuous validation. *J Softw Maint Evol, Research and Practice – Best papers from the BPM 2008 Workshops* 22(67):547–566
- Kunzle V, Reichert M (2009) Integrating users in object-aware process management systems: Issues and challenges. In: Proceedings of the BPM'09 Workshops, 5th Int. Workshop on Business Process Design (BPD'09), Springer, Heidelberg, no. 43 in LNBIP, pp 29–41
- La Rosa M, Dumas M, ter Hofstede AH, Mendling J, Gottschalk F (2007) Beyond control-flow: Extending business process configuration to resources and objects. Unpublished



- 
- Lawson C, Zhu F (2012) Sentential access control. In: Proceedings of the 50th Annual Southeast Regional Conference, ACM, ACM-SE'12, pp 303–308
- Lehmann A, Lohmann N (2012) Modeling wizard for confidential business processes. In: Proceedings of the Business Process Management Workshops, Springer, Heidelberg, LNBIP, pp 675–688
- Leitner M, Mangler J, Rinderle-Ma S (2011a) SPRINT- responsibilities: Design and development of security policies in process-aware information systems. *J Wirel Mob Netw Ubiquitous Comput Dependable Appl (JoWUA)* 2(4):4–26
- Leitner M, Rinderle-Ma S, Mangler J (2011b) AW-RBAC: access control in adaptive workflow systems. In: Proceedings of the 6th International Conference on Availability, Reliability and Security (ARES), IEEE, pp 27–34
- Leitner M, Baumgrass A, Schefer-Wenzl S, Rinderle-Ma S, Strembeck M (2012) A case study on the suitability of process mining to produce current-state RBAC model. In: Proceedings of the Business Process Management Workshops, Springer, Heidelberg, LNBIP, pp 719–724
- Leonardi C, Sabatucci L, Susi A, Zancanaro M (2010) Ahabs Leg: Exploring the issues of communicating semi-formal requirements to the final users. In: Proceedings of the International Conference on Advanced Information Systems Engineering (CAISE), Springer, Heidelberg
- Leoni M, Aalst WMP, Hofstede AH (2008) Visual support for work assignment in process-aware information systems. In: Proceedings of the 6th International Conference on Business Process Management, Springer, Heidelberg, BPM'08, pp 67–83
- de Leoni M, Adams M, van der Aalst WMP, ter Hofstede AHM (2012a) Visual support for work assignment in process-aware information systems: Framework formalisation and implementation. *Decis Support Syst* 54(1):345–361
- de Leoni M, Maggi FM, van der Aalst WMP (2012b) Aligning event logs and declarative process models for conformance checking. In: Proceedings of the 10th International Conference on Business Process Management (BPM), Springer, Heidelberg, pp 82–97
- Li C, Reichert M, Wombacher A (2011) Mining business process variants: Challenges, scenarios, algorithms. *Data Knowl Eng* 70(5):409–434
- Li L, Hosking J, Grundy J (2007) Visual modelling of complex business processes with trees, overlays and distortion-based displays. In: Proceedings of the IEEE Symposium on Visual Languages and Human-Centric Computing, IEEE Computer Society, VLHCC'07, pp 137–144

- 
- Lim HW, Kerschbaum F, Wang H (2012) Workflow signatures for business process compliance. *IEEE Trans Dependable Secur Comput* 9(5):756–769
- Liu Q, Zhang X, Chen X, Wang L (2012) The resource access authorization route problem in a collaborative manufacturing system. *J Intell Manuf* pp 1–13
- Lodderstedt T, Basin D, Doser J (2002) SecureUML: a UML-Based modeling language for model-driven security. In: *Proceedings of the 5th International Conference on UML - The Unified Modeling Language*, Springer, Heidelberg, pp 426–441
- Lodhi A, Köppen V, Saake G (2013) Business process improvement framework and representational support. In: *Proceedings of the 3rd International Conference on Intelligent Human Computer Interaction, IHCI 2011*, Springer, Heidelberg, pp 155–167
- Ly LT, Rinderle-Ma S, Göser K, Dadam P (2012) On enabling integrated process compliance with semantic constraints in process management systems. *Inf Syst Front* 14(2):195–219
- Ma G, Wu K, Zhang T, Li W (2011) A flexible policy-based access control model for workflow management systems. In: *Proceedings of the 2011 IEEE International Conference on Computer Science and Automation Engineering (CSAE)*, pp 533–537
- Macris A, Papadimitriou E, Vassilacopoulos G (2008) An ontology-based competency model for workflow activity assignment policies. *J Knowl Manag* 12:72–88
- Mahdiraji A, Rossi B, Sillitti A, Succi G (2012) Knowledge extraction from events flows. In: *Anastasi G, Bellini E, Nitto E, Ghezzi C, Tanca L, Zimeo E (eds) Methodologies and technologies for networked enterprises*, Springer, Heidelberg, pp 221–236
- Maier S, Minas M (2007) A pattern-based layout algorithm for diagram editors. *ECEASST* 7
- Maier S, Minas M (2008) A generic layout algorithm for meta-model based editors. In: *Proceedings of the 3rd International Symposium Applications of Graph Transformations with Industrial Relevance*, Springer, Heidelberg, *AGTIVE 2007*, pp 66–81
- Maier S, Minas M (2010) Interactive diagram layout. In: *Extended Abstracts on Human Factors in Computing Systems, ACM, CHI EA'10*, pp 4111–4116
- Makanju A, Brooks S, Zincir-Heywood AN, Milios EE (2008) Logview: Visualizing event log clusters. In: *Proceedings of the 2008 6th Annual Conference*

- 
- on Privacy, Security and Trust, IEEE Computer Society, PST'08, pp 99–108
- Mann M (1999) Organizational process visualization. In: Proceedings of the 32nd Annual Hawaii International Conference on Systems Sciences, IEEE
- Mans RS, Russell NC, van der Aalst WMP, Moleman AJ, Bakker PJM (2010) Schedule-aware workflow management systems. In: Transactions on petri nets and other models of concurrency II, Springer, Heidelberg, pp 121–143
- Martinho D, Silva AR (2012) A recommendation algorithm to capture end-users tacit knowledge. In: Proceedings of the International Conference on Business Process Management (BPM), Springer, Heidelberg
- Melcher J, Seese D (2008) Visualization and clustering of business process collections based on process metric values. In: Proceedings of the 10th International Symposium on Symbolic and Numeric Algorithms for Scientific Computing, IEEE Computer Society, SYNASC'08, pp 572–575
- Mendling J, Ploesser K, Strembeck M (2008) Specifying separation of duty constraints in BPEL4People processes. In: Proceedings of the 11th International Conference on Business Information Systems (BIS), Springer, Heidelberg, LNBIP, pp 273–284
- Misue K, Yazaki S (2012) Panoramic view for visual analysis of large-scale activity data. In: Proceedings of the business process management workshops, Springer, Heidelberg, pp 756–767
- Molloy I, Lobo J, Chari S (2011) Adversaries' holy grail: access control analytics. In: Proceedings of the 1st Workshop on Building Analysis Datasets and Gathering Experience Returns for Security, ACM, BADGERS'11, pp 54–61
- Momotko M, Nowicki B (2003) Visualisation of (distributed) process execution based on extended BPMN. In: Proceedings of the 14th International Workshop on Database and Expert Systems Applications, IEEE Computer Society, DEXA'03
- Monakova G, Schaad A (2011) Visualizing security in business processes. In: Proceedings of the 16th ACM Symposium on Access Control Models and Technologies, ACM, SACMAT'11, pp 147–148
- Monakova G, Brucker AD, Schaad A (2012) Security and safety of assets in business processes. In: Proceedings of the 27th Annual ACM Symposium on Applied Computing, ACM, SAC'12, pp 1667–1673
- Mosser S, Bergel A, Blay-Fornarino M (2010) Visualizing and assessing a compositional approach of business process design. In: Proceedings of the 9th International Conference on Software Composition, Springer, Heidelberg,

- SC'10, pp 90–105
- Motahari-Nezhad HR, Saint-Paul R, Casati F, Benatallah B (2011) Event correlation for process discovery from web service interaction logs. *VLDB J* 20(3):417–444
- Muic G, Matko D (1999) Combined simulation for process control: extension of a general purpose simulation tool. *Comput Ind* 38(2):79–92
- Müller J, Kavak M, Böhm K (2012) A graphical audit facility for data processing and its evaluation with users. In: *Proceedings of the 14th Asia-Pacific International Conference on Web Technologies and Applications*, Springer, Heidelberg, APWeb'12, pp 618–627
- Müller R, Rogge-Solti A (2011) BPMN for healthcare processes. In: *Proceedings of the 3rd Central-European Workshop on Services and their Composition*, CEUR-WS.org, ZEUS 2011, pp 65–72
- Nakatumba J, Aalst WMP (2010) Analyzing resource behavior using process mining. In: Rinderle-Ma S, Sadiq S, Leymann F, van der Aalst WMP, Mylopoulos J, Rosemann M, Shaw MJ, Szyperski C (eds) *Business Process Management Workshops*, LNBIP, Springer, Heidelberg, pp 69–80
- Nasirifard P, Peristeras V, Decker S (2011) Annotation-based access control for collaborative information spaces. *Comput Hum Behav* 27(4):1352–1364
- Nissen ME (2005) Experimental assessment of an innovation knowledge system for decision support. *BPM J*
- Oh S, Park S (2003) Task-role-based access control model. *Inf Syst* 28(6):533–562
- Ouyang C, Wynn MT, Fidge C, ter Hofstede AH, Kuhr JC (2010) Modelling complex resource requirements in business process management systems. In: Rosemann M, Green P, Rohde F (eds) *Proceedings of the 21st Australasian Conference on Information Systems: Defining and Establishing a High Impact Discipline (ACIS 2010)*, ACIS
- Ouyang C, Wynn MT, Kuhr JC, Adams MJ, Becker T, ter Hofstede AH, Fidge CJ (2011) Workflow support for scheduling in surgical care processes. In: *Proceedings of the 19th European Conference on Information Systems: ICT and Sustainable Service Development (ECIS)*
- Paci F, Ferrini R, Sun Y, Bertino E (2008) Authorization and user failure resiliency for WS-BPEL business processes. In: *Proceedings of the 6th International Conference on Service-Oriented Computing (ICSOC)*, Springer, Heidelberg, LNCS, pp 116–131

- 
- Pantazos K, Tarkan S, Plaisant C, Shneiderman B (2012) Promoting timely completion of multi-step processes – a visual approach to retrospective analysis. Tech. rep., HCIL-2012-09
- Park JS, Kang MH, Froscher JN (2001) A secure workflow system for dynamic collaboration. In: Proceedings of the 16th IFIP TC11 International Conference on Information Security, Kluwer Academic Publishers, Sec'01, pp 167–181
- Park SH, Han YJ, Eom JH, Chung TM (2009) Architecture of context-aware workflow authorization management systems for workflow-based systems. In: Proceedings of the 12th Asia-Pacific Network Operations and Management Symposium (APNOMS), Springer, Heidelberg, pp 375–384
- Philippi S, Hill HJ (2007) Communication support for systems engineering - process modelling and animation with APRIL. *J Syst Softw* 80(8):1305–1316
- Piessens D, Wynn MT, Adams MJ, van Dongen B (2010) Performance analysis of business process models with advanced constructs. In: 21st Australasian Conference on Information Systems, ACIS 2010
- Plakoutsi A, Papadogianni G, Glykas M (2013) Performance measurement in business process, workflow and human resource management. In: Glykas M (ed) Business process management, Studies in Computational Intelligence, Springer, Heidelberg, pp 129–156
- Ploom T, Scheit S, Glaser A (2012) Methodology for migration of long running process instances in a global large scale BPM environment in credit suisse's SOA landscape. In: Proceedings of the 34th International Conference on Software Engineering, IEEE Computer Society, ICSE, pp 977–986
- Poelmans J, Dedene G, Verheyden G, Van Der Musselle H, Viaene S, Peters E (2010) Combining business process and data discovery techniques for analyzing and improving integrated care pathways. In: Proceedings of the 10th Industrial Conference on Advances in Data Mining: Applications and Theoretical Aspects, Springer, Heidelberg, ICDM'10
- Polyvyanyy A, Smirnov S, Weske M (2008) Process model abstraction: A slider approach. In: Proceedings of the 2008 12th International IEEE Enterprise Distributed Object Computing Conference, IEEE Computer Society, EDOC'08, pp 325–331
- Poppe E, Brown R, Johnson D, Recker J (2012) Preliminary evaluation of an augmented reality collaborative process modelling system. In: Proceedings of the International Conference on Cyberworlds, IEEE Computer Society, CW, pp 77–84

- 
- Prechelt L, Hutzel DJ (2005) Market forces and end-user programming for mission-critical systems. *ACM SIGSOFT Softw Eng Notes* 30(4):1–4
- Puente G, Díaz O (2012) Wiki refactoring as mind map reshaping. In: *Proceedings of the International Conference on Advanced Information Systems Engineering (CAISE)*, Springer, Heidelberg
- Reichert M, Bassil S, Bobrik R, Bauer T (2010) The proviado access control model for business process monitoring components. *Enterp Model Inf Syst Archit* 5(3):64–88
- Ren C, Wang W, Dong J, Ding H, Shao B, Wang Q (2008) Towards a flexible business process modeling and simulation environment. In: *Proceedings of the 40th Conference on Winter Simulation, Winter Simulation Conference, WSC'08*
- Rodríguez C, Silveira P, Daniel F, Casati F (2010) Analyzing compliance of service-based business processes for root-cause analysis and prediction. In: *Proceedings of the 10th International Conference on Current Trends in Web Engineering*, Springer, Heidelberg, ICWE'10, pp 277–288
- Roger AE, Marcel FN, Marthe AM, Zobo EP (2006) Feature-oriented workflow modelling based on enterprise human resource planning. *BPM J*
- Rozinat A, der Aalst WMP (2006) Conformance testing: Measuring the fit and appropriateness of event logs and process models. In: *Proceedings of the Business Process Management Workshops, LNCS*, Springer, Heidelberg, pp 163–176
- Rozinat A, van der Aalst WMP (2006) Decision Mining in Business Processes. *BPM Center Report BPM-06-10*, BPMcenter.org
- Rozinat A, van der Aalst WMP (2008) Conformance checking of processes based on monitoring real behavior. *Inf Syst* 33(1):64–95
- Rozinat A, Mans RS, Song M, Aalst WMPvd (2008) Discovering colored petri nets from event logs. *Int J Softw Tools Technol Transf* 10(1):57–74
- Russell N, Aalst WMP (2008) Work distribution and resource management in bpel4people: Capabilities and opportunities. In: *Proceedings of the 20th International Conference on Advanced Information Systems Engineering*, Springer, Heidelberg, CAiSE, pp 94–108
- Russell N, Hofstede AHMT, Edmond D (2005) Workflow resource patterns: Identification, representation and tool support. In: *Proceedings of the 17th Conference on Advanced Information Systems Engineering (CAiSE)*, Springer, Heidelberg, pp 216–232

- 
- Russello G, Dong C, Dulay N (2008) Consent-based workflows for healthcare management. In: Proceedings of the 9th IEEE International Workshop on Policies for Distributed Systems and Networks (POLICY), IEEE Computer Society, pp 153–161
- Russo A, Mecella M, de Leoni M (2012) ROME4EU – a service-oriented process-aware information system for mobile devices. *Softw Pract Exp* 42(10)
- Sajjad F, Lee H, Kamal M, Irani Z (2011) Workflow technology as an e-participation tool to support policy-making processes. *J Enterp Inf Manag*
- Satzger B, Psaiar H, Schall D, Dustdar S (2011) Stimulating skill evolution in market-based crowdsourcing. In: Proceedings of the International Conference on Business Process Management (BPM), Springer, Heidelberg
- Schonenberg H, Weber B, Dongen B, Aalst WMP (2008) Supporting flexible processes through recommendations based on history. In: Proceedings of the International Conference on Business Process Management (BPM), Springer, Heidelberg
- Schönhage B, van Ballegooij A, Elliens A (2000) 3D gadgets for business process visualization; a case study. In: Proceedings of the 5th Symposium on Virtual Reality Modeling Language (Web3D-VRML), ACM, VRML'00
- Schumm D, Karastoyanova D, Leymann F, Nitzsche J (2009) On visualizing and modelling BPEL with BPMN. In: Proceedings of the 2009 Workshops at the Grid and Pervasive Computing Conference, IEEE Computer Society, GPC'09, pp 80–87
- Seidel S (2011) Toward a theory of managing creativity-intensive processes: a creative industries study. *Inf Syst E-Bus Manag* 9:407–446
- Seidel S, Adams M, ter Hofstede AH, Rosemann M (2007) Modelling and supporting processes in creative environments. In: Proceedings of the 15th European Conference on Information Systems
- Seidel S, Mueller-Wienbergen F, Rosemann M (2010a) Pockets of creativity in business processes. *Commun Assoc Inf Syst* 27
- Seidel S, Shortland K, Court D, Elzinga D (2010b) Managing creativity-intensive processes: Learning from film and visual effects production. In: vom Brocke J, Rosemann M (eds) *Handbook on business process management 2*, International Handbooks on Information Systems, Springer, Heidelberg, pp 515–538
- Seyfang A, Kaiser K, Gschwandtner T, Miksch S (2012) Visualizing complex process hierarchies during the modeling process. In: Proceedings of the Busi-

- 
- ness Process Management Workshops, Springer, Heidelberg, pp 768–779
- Shafiq B, Samuel A, Ghafoor H (2005) A GTRBAC based system for dynamic workflow composition and management. In: Proceedings of the 8th IEEE International Symposium on Object-Oriented Real-Time Distributed Computing (ISORC), IEEE Computer Society, pp 284–290
- Shan Z, Yang Y, Li Q, Luo Y, Peng Z (2006) A light-weighted approach to workflow view implementation. In: Proceedings of the 8th Asia-Pacific Web conference on Frontiers of WWW Research and Development, Springer, Heidelberg, APWeb'06, pp 1059–1070
- Singh R, Salam A (2006) Semantic information assurance for secure distributed knowledge management: a business process perspective. *IEEE Trans Syst Man Cybern, Part A: Systems and Humans* 36(3):472–486
- Six JM, Tollis IG (2002) Automated visualization of process diagrams. In: Proceedings of the 9th International Symposium on Graph Drawing, Springer, Heidelberg, pp 45–59
- Sohr K, Kuhlmann M, Gogolla M, Hu H, Ahn GJ (2012) Comprehensive two-level analysis of role-based delegation and revocation policies with UML and OCL. *Inf Softw Technol* 54(12):1396–1417
- Song M, van der Aalst WMP (2008) Towards comprehensive support for organizational mining. *Decis Support Sys* 46(1):300–317
- Sousa KS, Mendonça H, Lievyans A, Vanderdonckt J (2011) Getting users involved in aligning their needs with business processes models and systems. *BPM J*
- Spears JL, Barki H (2010) User participation in information systems security risk management. *MIS Q* 34(3):503–522
- Stilhammer J, Klinger A, Berkhahn V (2006) Consistent representation and manipulation of hierarchical graph systems for process modelling. In: Proceedings of the 6th European Conference on Product and Process Modelling, Francis/Balkema, ECPPM'06
- Stoitsev T, Scheidl S, Flentge F, Muehlhaeuser M (2008) From personal task management to end-user driven business process modeling. In: Proceedings of the International Conference on Business Process Management (BPM), Springer, Heidelberg
- Streit A, Pham B, Brown R (2005) Visualization support for managing large business process specifications. In: Proceedings of the 3rd International Conference on Business Process Management(BPM), Springer, Heidelberg, pp 205–219



- 
- Sun Y, Meng X, Liu S, Pan P (2006) Flexible workflow incorporated with RBAC. In: Proceedings of the 9th International Conference on Computer Supported Cooperative Work in Design, Springer, Heidelberg, LNCS, pp 525–534
- Süntinger M, Obwegger H, Schiefer J, Gröller ME (2008) The event tunnel: Interactive visualization of complex event streams for business process pattern analysis. In: Proceedings of the IEEE VGTC Pacific Visualization Symposium, IEEE Computer Society, PacificVis'08, pp 111–118
- Thomas J, Paci F, Bertino E, Eugster P (2007) User tasks and access control over web services. In: Proceedings of the IEEE International Conference on Web Services (ICWS), IEEE Computer Society, pp 60–69
- Thomas RK, Sandhu RS (1993) Towards a task-based paradigm for flexible and adaptable access control in distributed applications. In: Proceedings on the 1992-1993 Workshop on New Security Paradigms, ACM, pp 138–142
- Tominski C (2011) Event-based concepts for user-driven visualization. *Inf Vis* 10(1):65–81
- van der Aalst WMP (2005) Process mining in CSCW systems. In: Proceedings of the 9th International Conference on Computer Supported Cooperative Work in Design, IEEE Computer Society
- van der Aalst WMP, Kumar A (2001) A reference model for team-enabled workflow management systems. *Data Knowl Eng* 38(3):335–363
- van der Aalst WMP, Song M (2004) Mining social networks: Uncovering interaction patterns in business processes. In: Proceedings of the International Conference on Business Process Management (BPM), Springer, Heidelberg
- van der Aalst WMP, Reijers HA, Song M (2005) Discovering social networks from event logs. *Comput Support Coop Work* 14(6):549–593
- van der Aalst WMP, Dumas M, Ouyang C, Rozinat A, Verbeek E (2008) Conformance checking of service behavior. *ACM Trans Internet Technol* 8(3)
- van der Aalst WMP, Schonenberg MH, Song M (2011) Time prediction based on process mining. *Inf Syst* 36(2):450–475
- Vanderfeesten I (2005) Workflow management as you like it. *BPTrends*
- Vanderfeesten I, Reijers HA (2005) A human-oriented tuning of workflow management systems. In: Aalst WMP, Benatallah B, Casati F, Curbera F (eds) Proceedings of the International Conference on Business Process Management (BPM), LNCS, Springer, Heidelberg, pp 80–95

- Vanderfeesten I, Reijers HA (2006) How to increase work autonomy in workflow management systems? *Manag Res News*
- Varró D, Asztalos M, Bisztray D, Boronat A, Dang DH, GeißR, Greenyer J, Van Gorp P, Knemeyer O, Narayanan A, Rencis E, Weinell E (2008) Transformation of uml models to csp: A case study for graph transformation tools. In: *Proceedings of the 3rd International Symposium Applications of Graph Transformations with Industrial Relevance, AGTIVE 2007*, Springer, Heidelberg, pp 540–565
- Veiga GM, Ferreira DR (2009) Understanding spaghetti models with sequence clustering for ProM. In: *Proceedings of the Business Process Management Workshops*, Springer, Heidelberg
- Venter K, Olivier MS (2002) The delegation authorization model: A model for the dynamic delegation of authorization rights in a secure workflow management system. In: *Proceedings of the 2nd Annual Conference on Information for Security for South-Africa (ISSA)*, pp 1–12, (published electronically)
- Verbeek HM, Pretorius AJ, Aalst WMP, Wijk JJ (2008) Assessing state spaces using petri-net synthesis and attribute-based visualization. In: Jensen K, Aalst WMP, Billington J (eds) *Transactions on petri nets and other models of concurrency I*, Springer, Heidelberg, pp 152–171
- Virine L, Rapley L (2003) The process of process reengineering: visualization of probabilistic business models. In: *Proceedings of the 35th Conference on Winter Simulation: driving innovation, Winter Simulation Conference, WSC'03*
- Waal B, Batenburg R (2009) Design decisions in workflow management and quality of work. *Int J Inf Syst Change Manag* 3(4):359–374
- Wainer J, Barthelmess P, Kumar A (2003) W-RBAC - a workflow security model incorporating controlled overriding of constraints. *Int J Coop Inf Syst* 12(4):455–485
- Wainer J, Kumar A, Barthelmess P (2007) DW-RBAC: a formal security model of delegation and revocation in workflow systems. *Inf Syst* 32(3):365–384
- Wang X, Bayrak C (2009) Injecting a permission-based delegation model to secure web-based workflow systems. In: *Proceedings of the 2009 IEEE International Conference on Intelligence and Security Informatics (ISI)*, IEEE, ISI'09, pp 101–106
- Weber B, Reichert M, Wild W, Rinderle S (2005) Balancing flexibility and security in adaptive process management systems. In: *Proceedings of the 13th*

- 
- International Conference on Cooperative Information Systems (CoopIS), Springer, Heidelberg, LNCS, pp 59–76
- West S, Brown RA, Recker JC (2010) Collaborative business process modeling using 3D virtual environments. In: Proceedings of the 16th Americas Conference on Information Systems, Association for Information Systems (AIS)
- Witschel HF, Hu B, Riss UV, Thoenssen B, Brun R, Martin A, Hinkelmann K (2010) A collaborative approach to maturing process-related knowledge. In: Proceedings of the International Conference on Business Process Management (BPM), Springer, Heidelberg
- Wolter C, Schaad A, Meinel C (2008) Task-based entailment constraints for basic workflow patterns. In: Proceedings of the 13th ACM Symposium on Access Control Models and Technologies, ACM, SACMAT'08, pp 51–60
- Wolter C, Menzel M, Schaad A, Miseldine P, Meinel C (2009) Model-driven business process security requirement specification. *J Syst Archit* 55(4):211–223
- Wong AK, Chan LW, Liu Y (2009) Automating object-oriented integration and visualization of multidisciplinary biomedical data in radiology workflow: compartmental PACS model. *Inf Syst Front* 11(4):369–379
- Wu S, Sheth A, Miller J, Luo Z (2002) Authorization and access control of application data in workflow systems. *J Intell Inf Syst* 18(1):71–94
- Xiao Z, Chang H, Wen S, Yi Y, Inoue A (2006) An extended meta-model for workflow resource model. In: Lang J, Lin F, Wang J (eds) Knowledge science, engineering and management, LNCS, vol 4092, Springer, Heidelberg, pp 525–534
- Xu W, Shehab M, Ahn GJ (2008) Visualization based policy analysis: case study in SELinux. In: Proceedings of the 13th ACM Symposium on Access Control Models and Technologies, ACM, SACMAT'08, pp 165–174
- Yamamoto R, Yamamoto K, Ohashi K, Inomata J (2005) Development of a business process modeling methodology and a tool for sharing business processes. In: Proceedings of the 12th Asia-Pacific Software Engineering Conference, IEEE Computer Society, APSEC'05, pp 679–686
- Yang Y, Lai W, Shen J, Huang X, Yan J, Setiawan L (2004) Effective visualisation of workflow enactment. In: Proceedings of the 6th Asia-Pacific Web Conference, Springer, Heidelberg, APWeb, pp 794–803
- Yu Y, Pan M, Li X, Jiang H (2011) Tabu search heuristics for workflow resource allocation simulation optimization. *Concurr Comput Pract Exp* 23(16)

- Zacarias M, Pinto HS, Magalhães R, Tribolet J (2010) A 'context-aware' and agent-centric perspective for the alignment between individuals and organizations. *Inf Syst* 35:441–466
- Zhang H, Liu Y, Li C, Jiao R (2010) A novel approach of process mining with event graph. In: *Proceedings of the 14th International Conference on Knowledge-based and Intelligent Information and Engineering Systems*, Springer, Heidelberg, KES'10, pp 131–140
- Zhang P, Serban N (2007) Discovery, visualization and performance analysis of enterprise workflow. *Comput Stat Data Anal* 51(5):2670–2687
- Zhao X, Han J, Huang Y (2009) An automatic layout function in BPEL visual modeling tool. In: *Proceedings of the 2009 10th ACIS International Conference on Software Engineering, Artificial Intelligences, Networking and Parallel/Distributed Computing*, IEEE Computer Society, SNPD'09, pp 14–17
- Zugal S, Haisjackl C, Pinggera J, Weber B (2012) Empirical evaluation of test driven modeling. *Int J Inf Syst Model Des*
- Zur Muehlen M (2004) Organizational management in workflow applications – issues and perspectives. *Inf Technol Manag* 5:271–291
